# Supplementary material for: High catalytic activity of a bimetallic AgPd alloy supported on UiO-66 derived porous carbon for transfer hydrogenation of nitroarenes using formic acid-formate as the hydrogen source
Source: Royal Society of Chemistry journal article supplement (doi:10.1039/c7nj00442g), 2017-01-01
Supplement: c7nj00442g1.pdf [file c7nj00442g1.pdf]

## **ELECTRONIC SUPPORTING INFORMATION (ESI)**

### **High catalytic activity of bimetallic AgPd alloy supported on UiO-66 derived porous carbon for transfer hydrogenation of nitroarenes using formic acid-formate as hydrogen source**

*Saisai Cheng, Ningzhao Shang, Xin Zhou, Cheng Feng\*, Shutao Gao, Chun Wang\*, Zhi Wang*

College of Science, Hebei Agricultural University, Baoding 071001, China

**Table S1** Reduction of nitrobenzene to aniline with different hydrogen source over Ag<sub>1</sub>Pd<sub>9</sub>@NPC-UiO-66-800 catalyst.<sup>[a]</sup>

| Entry            | FA (mmol) | Ammonium formate (mmol) | Time (min) | Conversion (%) | Selectivity (%) |
|------------------|-----------|-------------------------|------------|----------------|-----------------|
| 1                | 4         | 0                       | 12 h       | 15             | 86              |
| 2                | 0         | 4                       | 2 h        | 99             | >99             |
| 3                | 4         | 4                       | 20         | 99             | >99             |
| 4                | 4         | 8                       | 15         | 99             | >99             |
| 5 <sup>[b]</sup> | 4         | 4                       | 60         | 98             | >99             |
| 6 <sup>[c]</sup> | 4         | 4                       | 3 h        | 87             | 93              |

[a] Reaction conditions: nitrobenzene (1 mmol), Ag<sub>1</sub>Pd<sub>9</sub>@NPC-UiO-66-800 (1 mol%), methanol (5 mL), 25 °C. GC analysis using *n*-decane as an internal standard. [b] HCOONa. [c] HCOOK.

**Table S2** Various reported catalyst tested for reduction of nitroarenes into anilines.

| Entry | Catalyst                                                                                            | Hydrogen source                                 | Temp (°C) | Time (h) | TOF[h <sup>-1</sup> ] <sup>[a]</sup> | Ref |
|-------|-----------------------------------------------------------------------------------------------------|-------------------------------------------------|-----------|----------|--------------------------------------|-----|
| 1     | C-Pd-Fe <sub>3</sub> O <sub>4</sub>                                                                 | NaBH <sub>4</sub>                               | 25        | 0.5      | 545                                  | [1] |
| 2     | Au/TiO <sub>2</sub> -EC                                                                             | 10 atm H <sub>2</sub>                           | 90-120    | 2-7      | 53-279                               | [2] |
| 3     | ZIF-67-derived nanocomposites                                                                       | NH <sub>3</sub> BH <sub>3</sub>                 | 25        | 1.5-4    | 1.00-2.61                            | [3] |
| 4     | Pd-Pt-Fe <sub>3</sub> O <sub>4</sub>                                                                | NH <sub>3</sub> BH <sub>3</sub>                 | 25        | 5        | 188-1176                             | [4] |
| 5     | Fe-MIL-88A-C                                                                                        | N <sub>2</sub> H <sub>4</sub> ·H <sub>2</sub> O | 85        | 0.75-12  | 2-53                                 | [5] |
| 6     | Ni-MoO <sub>3</sub> /CN@SBA-15                                                                      | N <sub>2</sub> H <sub>4</sub> ·H <sub>2</sub> O | 40        | 0.5-1    | 357-715                              | [6] |
| 7     | Au/rutile                                                                                           | HCOOH                                           | 60        | 0.67-4   | 25-149                               | [7] |
| 8     | [Mo <sub>3</sub> S <sub>4</sub> H <sub>3</sub> (dmpe) <sub>3</sub> ]BPh <sub>4</sub> <sup>[b]</sup> | HCOOH-Et <sub>3</sub> N                         | 70        | 18       | 0.54-1.85                            | [8] |
| 9     | Fe <sub>2</sub> O <sub>3</sub> /NGr@C                                                               | HCOOH-Et <sub>3</sub> N                         | 120       | 20-24    | 0.74-0.95                            | [9] |

|    |                                                    |                         |    |        |        |           |
|----|----------------------------------------------------|-------------------------|----|--------|--------|-----------|
| 10 | $\gamma\text{-Fe}_2\text{O}_3\text{@HAP-Pd}^{[c]}$ | $\text{HCOONH}_4$       | 60 | 3      | 35-30  | [10]      |
| 11 | $\text{Ag}_1\text{Pd}_9\text{@NPC-UiO-66-800}$     | $\text{HCOOH-HCOONH}_4$ | 25 | 0.33-6 | 15-300 | This work |

[a] mol of substrate transformed per mol of catalyst per hour. [b] dmpe = 1,2 (bis)dimethylphosphinoethane. [c] HAP = hydroxyapatite.

**Table S3** Reusability of  $\text{Ag}_1\text{Pd}_9\text{@NPC-UiO-66-800}$  catalyst for reduction of nitrobenzene to aniline.<sup>[a]</sup>

| Entry | Time (min) | Conversion (%) | Selectivity (%) |
|-------|------------|----------------|-----------------|
| 1     | 20         | >99            | >99             |
| 2     | 20         | >99            | >99             |
| 3     | 20         | >99            | >99             |
| 4     | 25         | 98             | >99             |
| 5     | 30         | 98             | >99             |

[a] nitrobenzene (1 mmol), FA (4 mmol),  $\text{HCOONH}_4$  (4 mmol),  $\text{Ag}_1\text{Pd}_9\text{@NPC-UiO-66-800}$  (1 mol% metal), methanol (5 mL); GC analysis using *n*-decane as an internal standard.

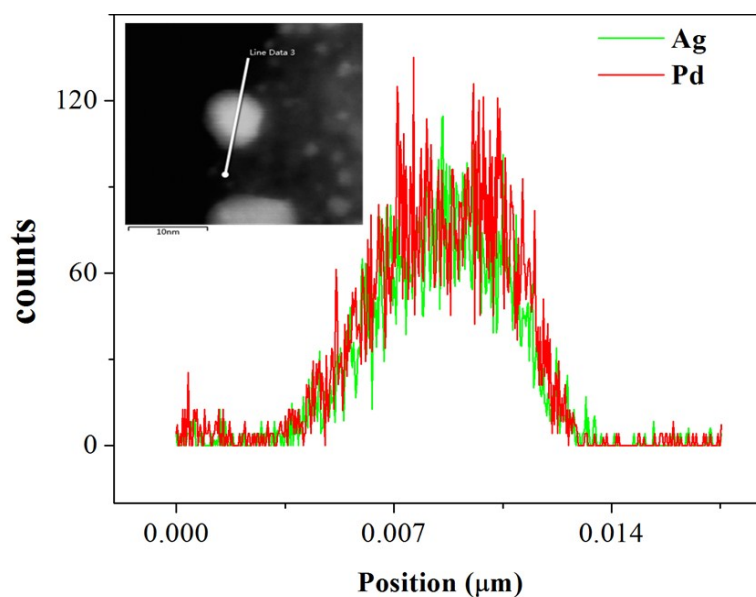

**Fig S1.** STEM-EDS line-scan of  $\text{Ag}_1\text{Pd}_9\text{@NPC-UiO-66-800}$ .

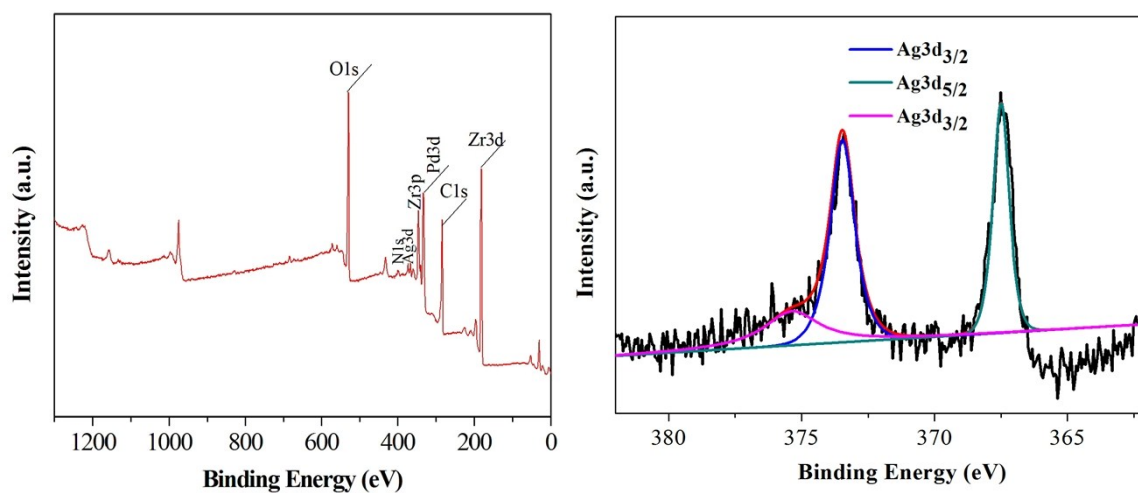

**Fig S2.** The XPS images of  $\text{Ag}_1\text{Pd}_9@\text{NPC-UiO-66-800}$ .

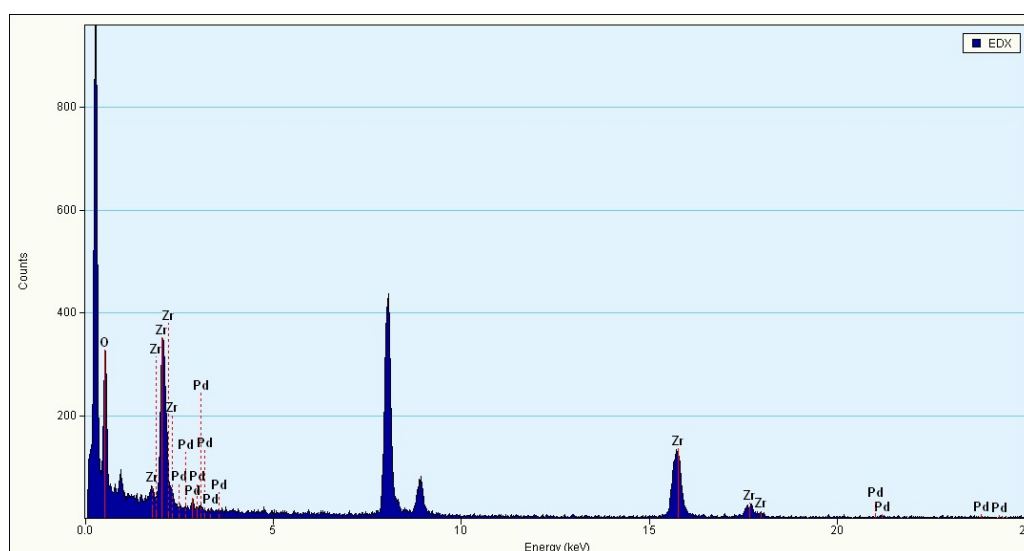

**Fig S3.** The Energy-dispersive X-ray spectroscopy (EDX) of  $\text{Ag}_1\text{Pd}_9@\text{NPC-UiO-66-800}$ .

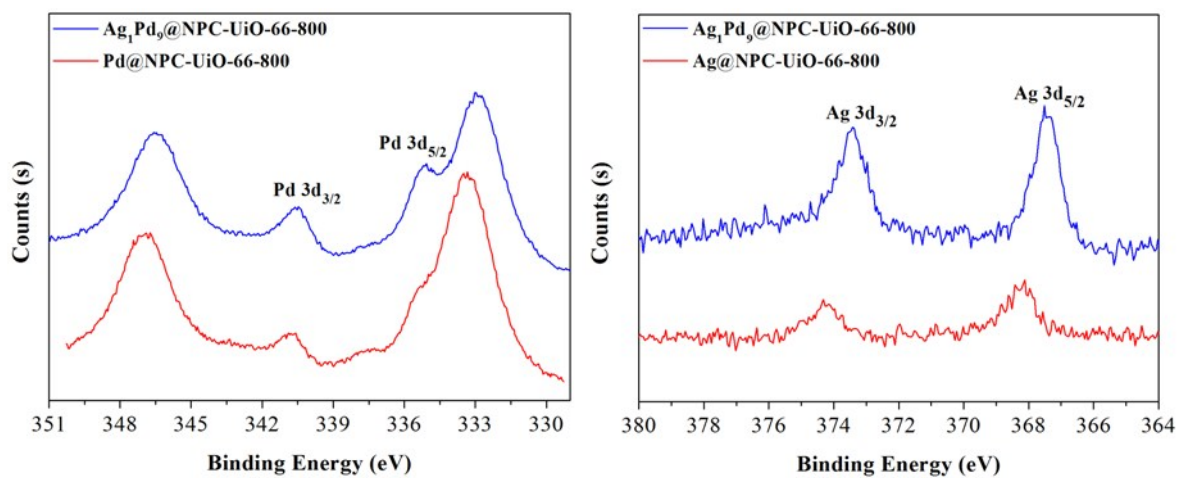

**Fig S4.** XPS images of Pd 3d and Ag 3d for  $\text{Pd}@\text{NPC-UiO-66-800}$ ,  $\text{Ag}_1\text{Pd}_9@\text{NPC-UiO-66-800}$ , and  $\text{Ag}@\text{NPC-UiO-66-800}$ .

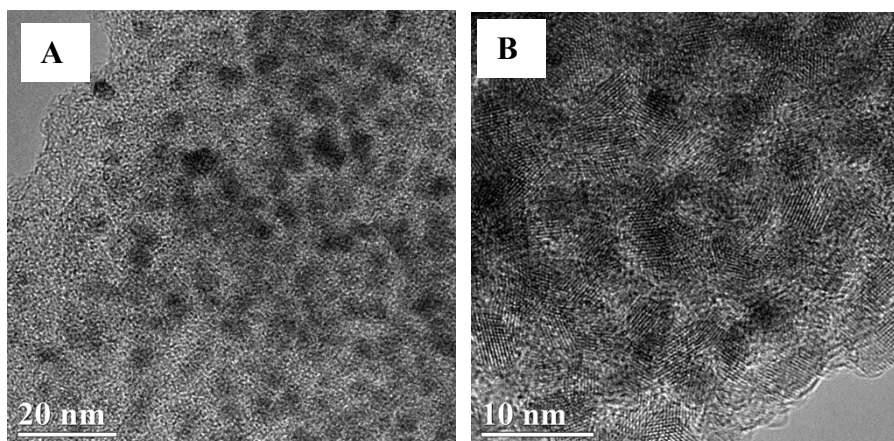

**Fig S5.** TEM pattern of the reused  $\text{Ag}_1\text{Pd}_9@NPC\text{-UiO-66-800}$ .

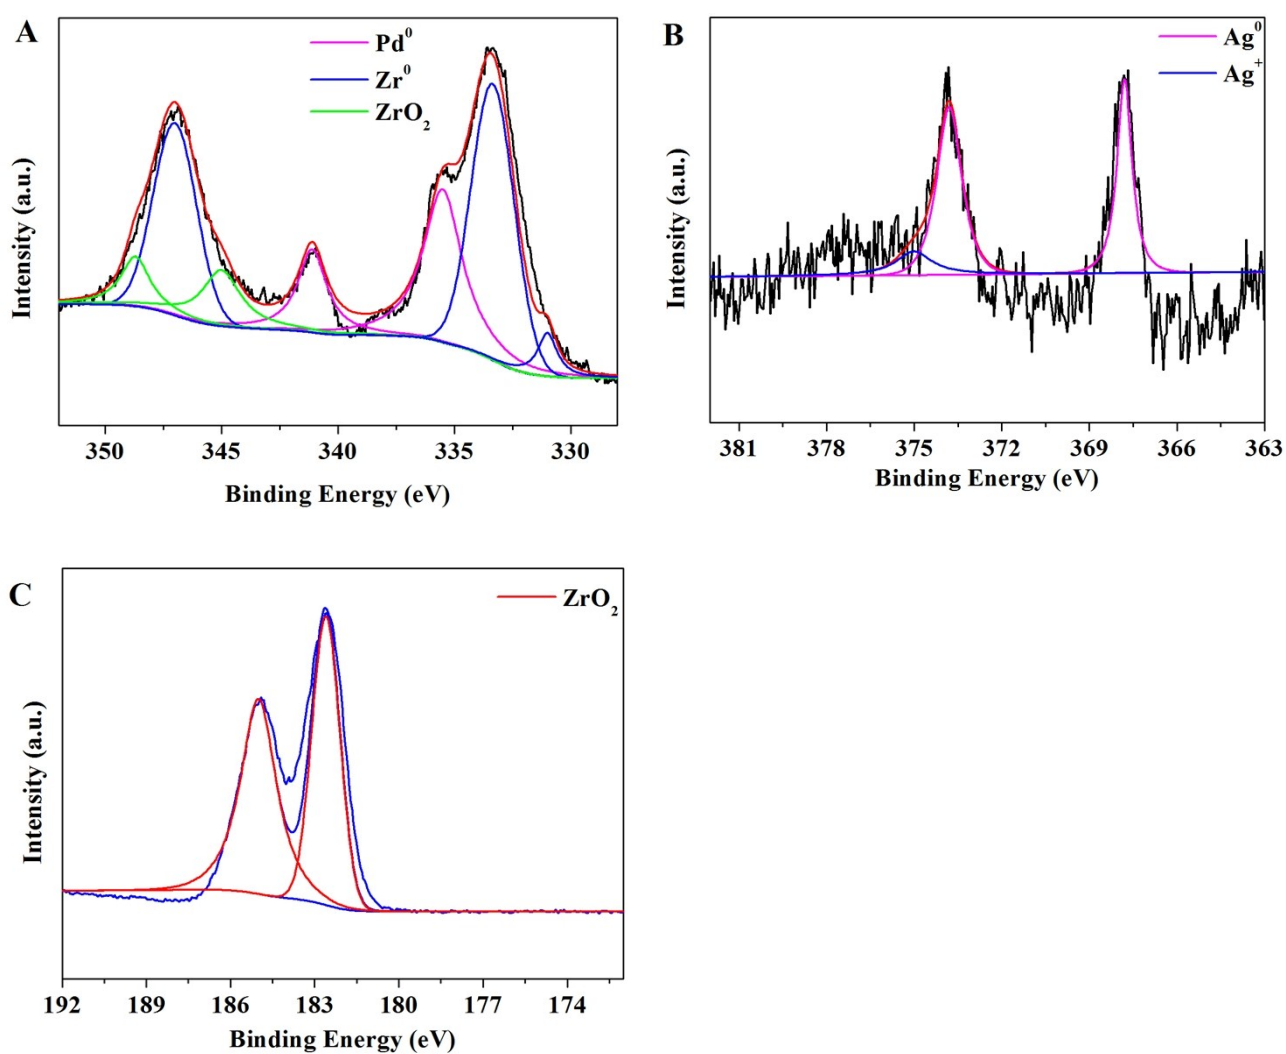

**Fig S6.** XPS pattern of the reused  $\text{Ag}_1\text{Pd}_9@NPC\text{-UiO-66-800}$ .

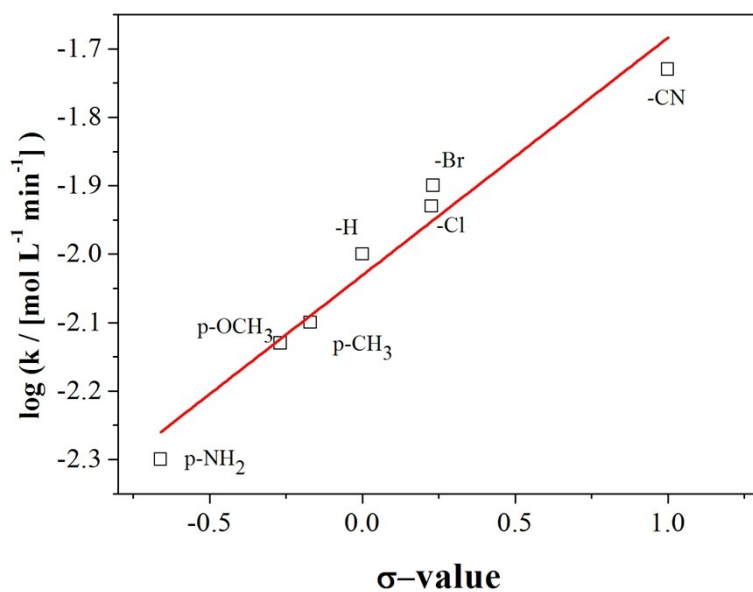

**Fig S7.** Hammett plot for the catalytic reduction of substituted nitrobenzenes at 25 °C.

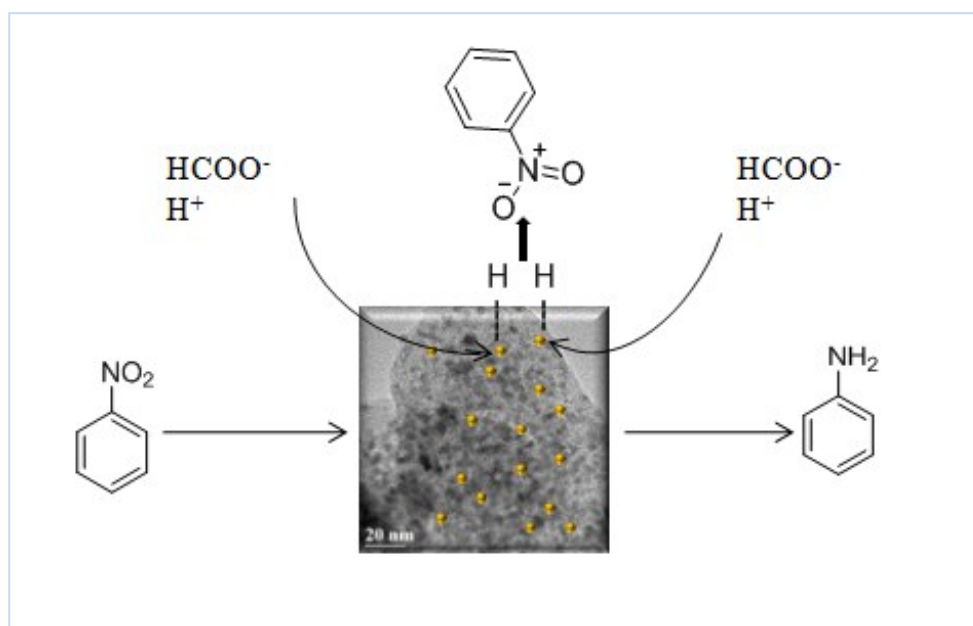

**Fig S8.** Tentative reaction mechanism for the reduction of nitroarenes over Ag<sub>1</sub>Pd<sub>9</sub>@NPC-UiO-66-800 catalyst.

## Reference

- [1] P. Zhou, D. Li, S. Jin, S. Chen, Z. Zhang, *Int. J. Hydrogen Energy* **2016**, *41*, 15218-15224.
- [2] L. Wang, J. Zhang, H. Wang, Y. Shao, X. Liu, Y.-Q. Wang, J. P. Lewis, F.-S. Xiao, *ACS Catal.* **2016**, *6*, 4110-4116.
- [3] X. Ma, Y. X. Zhou, H. Liu, Y. Li, H. L. Jiang, *Chem. Commun.* **2016**, *52*, 7719-7722.

- [4] S. Byun, Y. Song, B. M. Kim, *ACS Appl. Mater. Int.* **2016**, *8*, 14637-14647.
- [5] Y. Li, Y. X. Zhou, X. Ma, H. L. Jiang, *Chem. Commun.* **2016**, *52*, 4199-4202.
- [6] H. Huang, X. Wang, X. Li, C. Chen, X. Zou, W. Ding, X. Lu, *Green Chem.* **2017**.
- [7] L. Yu, Q. Zhang, S. S. Li, J. Huang, Y. M. Liu, H. Y. He, Y. Cao, *ChemSusChem* **2015**, *8*, 3029-3035.
- [8] I. Sorribes, G. Wienhofer, C. Vicent, K. Junge, R. Llusar, M. Beller, *Angew. Chem. Int. Ed.* **2012**, *51*, 7794-7798.
- [9] R. V. Jagadeesh, K. Natta, H. Junge, M. Beller, *ACS Catal.* **2015**, *5*, 1526-1529.
- [10] L. Jiang, Z. Zhang, *Int. J. Hydrogen Energy* **2016**, *41*, 22983-22990.
